# Supplementary material for: Growth responses of trees and understory plants to nitrogen fertilization in a subtropical forest in China
Source: Copernicus journal article supplement (doi:10.5194/bg-14-3461-2017), 2017-07-21
Supplement: Supplementary file 1 [file bg-14-3461-2017-supplement.zip]

## Supplement

**Table S1.** Allometric equations for the aboveground biomass of different plant species in this study.

| Species                        | Equations                          | a <sub>1</sub> | a <sub>2</sub> | b      | r <sup>2</sup> | p      |
|--------------------------------|------------------------------------|----------------|----------------|--------|----------------|--------|
| <i>W. japonica</i>             | $Y = X_1^{a_1} * X_2^{a_2} * 10^b$ | 1.703          | 0.790          | -3.418 | 0.92           | <0.001 |
| <i>C. japonica</i>             | $Y = a_1 * (BD^2 * H)^b$           | 0.061          |                | 0.707  | 0.99           | <0.001 |
| <i>C. cuspidate</i>            | $Y = a_1 * (CV)^b$                 | 0.001          |                | 0.829  | 0.94           | <0.001 |
| <i>R. ovatum</i>               | $Y = a_1 * (BD^2 * H) + b$         | 0.004          |                | 0.831  | 0.97           | <0.001 |
| <i>E. muricata</i>             | $Y = a_1 * (BD^2 * H)^b$           | 0.028          |                | 0.816  | 0.90           | <0.001 |
| <i>C. japonicum</i>            | $Y = a_1 * (CV)^b$                 | 0.005          |                | 0.716  | 0.90           | <0.001 |
| <i>C. subavenium</i>           | $Y = a_1 * (CV)^b$                 | 0.001          |                | 0.817  | 0.93           | <0.001 |
| <i>S. glabra</i>               | $Y = a_1 * (CV) + b$               | 0.0002         |                | 1.692  | 0.96           | <0.001 |
| <i>C. eyrei</i> <sup>(1)</sup> | $Y = a_1 * (D^2 * H)^b$            | 0.065          |                | 0.920  | 0.98           | <0.001 |
| Others <sup>(2)</sup>          | $Y = a_1 * (D^2 * H)^b$            | 0.095          |                | 0.870  | 0.91           | <0.001 |

Y: Aboveground biomass (g for shrubs; kg for trees/saplings); X<sub>1</sub> (cm): length of fern leaves; X<sub>2</sub> (cm): width of fern leaves; BD (basal diameter): diameter at 10 cm above the ground; H: height of plants (cm for shrubs/seedlings, m for trees/saplings); CV (cm<sup>3</sup>):  $3.14 * [(canopy\ length + canopy\ width) / 2]^2 * H$ ; D (cm): diameter at breast height (~1.3 m) of tree/saplings. (1) from Du *et al.* 1987; (2) from Zhang *et al.* 2007.
