# Supplementary material for: Growth responses of trees and understory plants to nitrogen fertilization in a subtropical forest in China
Source: Copernicus journal article supplement (doi:10.5194/bg-14-3461-2017), 2017-07-21
Supplement: Supplementary file 2 [file bg-14-3461-2017-supplement.zip]

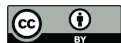

## *Supplement of*

# **Growth responses of trees and understory plants to nitrogen fertilization in a subtropical forest in China**

**Di Tian et al.**

*Correspondence to:* Jingyun Fang (jyfang@urban.pku.edu.cn)

- bg-14-3461-2017-supplement-title-page.pdf
- Supplement
  - 6.17Supplementary material-TableS1.docx
  - 6.17Supplementary material-TableS1.pdf
  - Supplement-Plant Growth and soil nutrient data.xlsx

The copyright of individual parts of the supplement might differ from the CC BY 3.0 License.
